# Supplementary material
Source: Springer Nature journal article supplement (https://www.springermedizin.de/resource/supplementary/12943_2010_670_MOESM9_ESM.pdf/9554538)

pLNSX

LMP1

0 2 4 8 12 24 48 0 2 4 8 12 24 48 hr TGF $\beta$  (5ng/ml)

pSmad3

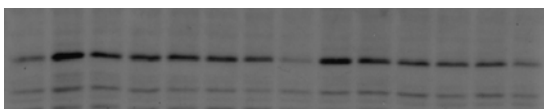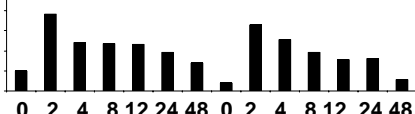

pSmad2

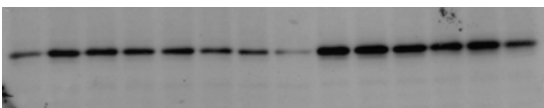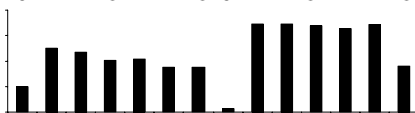

p21

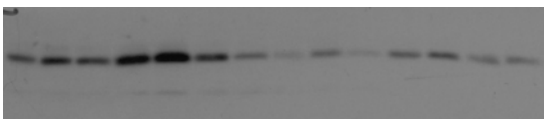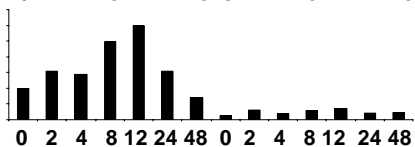

Id1

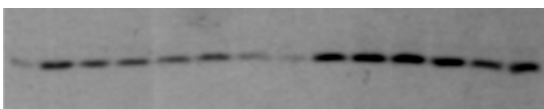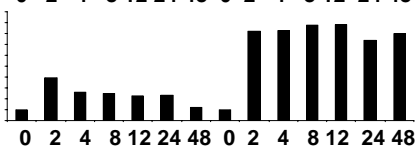

Foxo3a

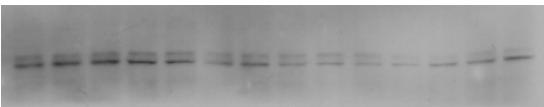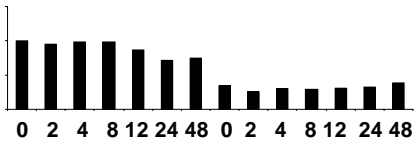

ATF3

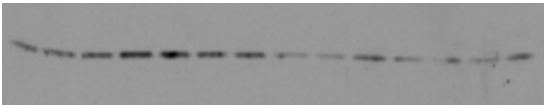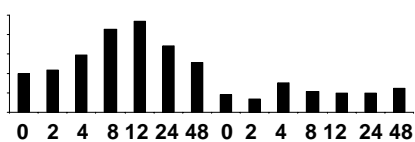

LMP1

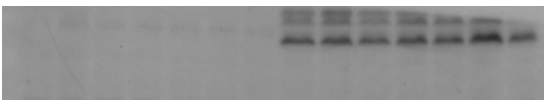

pLNSX LMP1

Actin

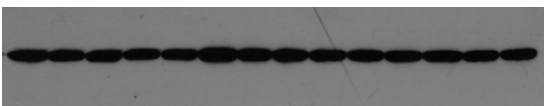

Supplement: MOESM9 [file 9554538]
